# Supplementary material for: Plasma Proteomic Analysis in Non-Small Cell Lung Cancer Patients Treated with PD-1/PD-L1 Blockade
Source: MDPI journal article supplement (doi:10.3390/cancers13133116), 2021-06-22
Supplement: s1 [file s1]

Supplementary Materials

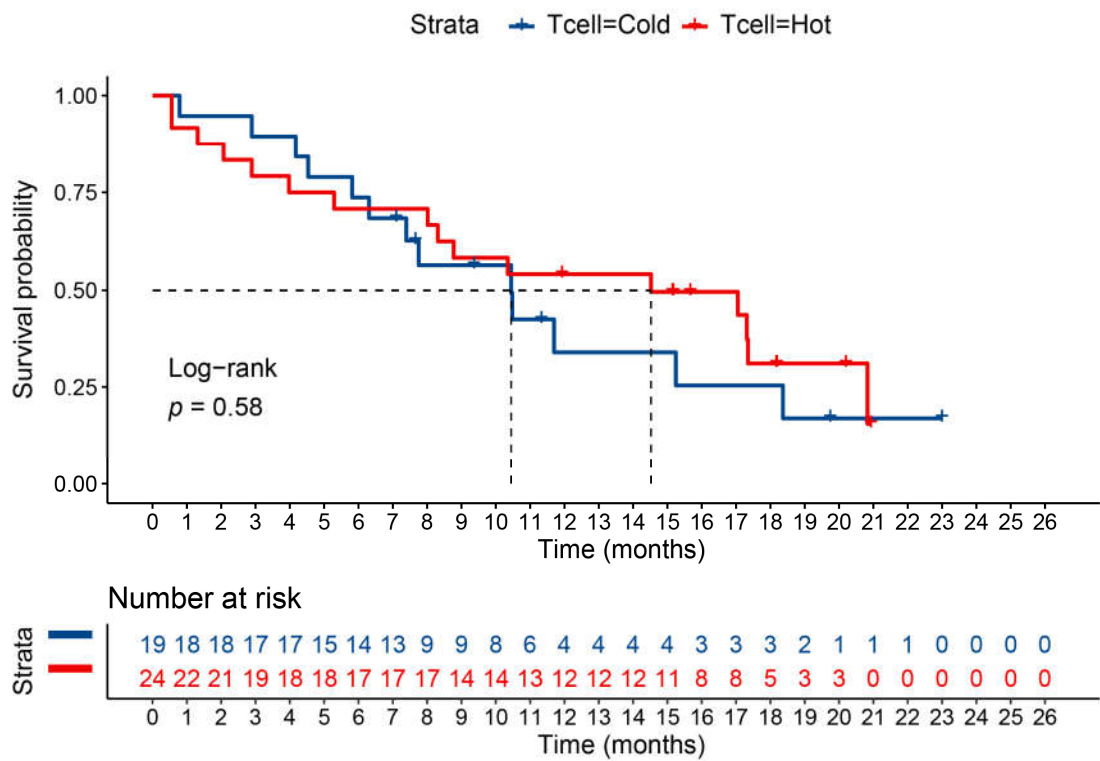

**Figure S1.** Kaplan–Meier overall survival curves based on hot and cold T cell activation signature. A log rank test was performed to compare the two groups.

### Supervised clustering based on APC-related markers

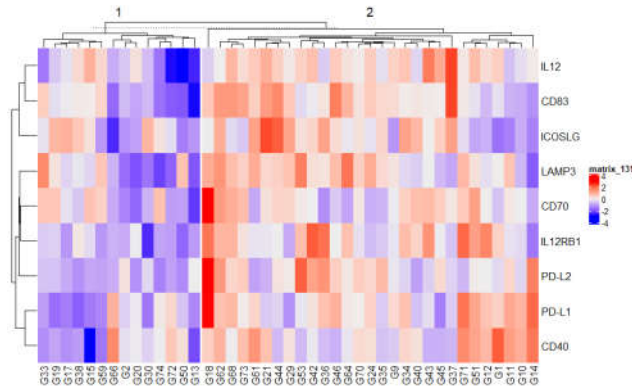

### Supervised clustering based on Myeloid/angiogenesis-related markers

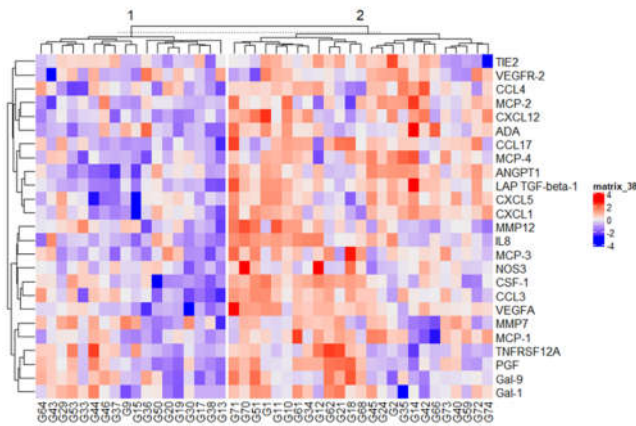

### Supervised clustering based on tumor-related markers

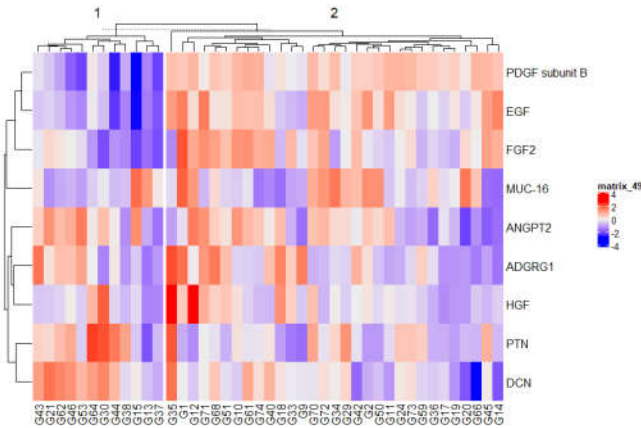

**Figure S2.** Hierarchical clustering analysis of protein expression. K-means clustering analysis of selected APC-related markers (9 proteins), myeloid/angiogenesis (25 proteins) and tumor-related markers (9 proteins) in the plasma.

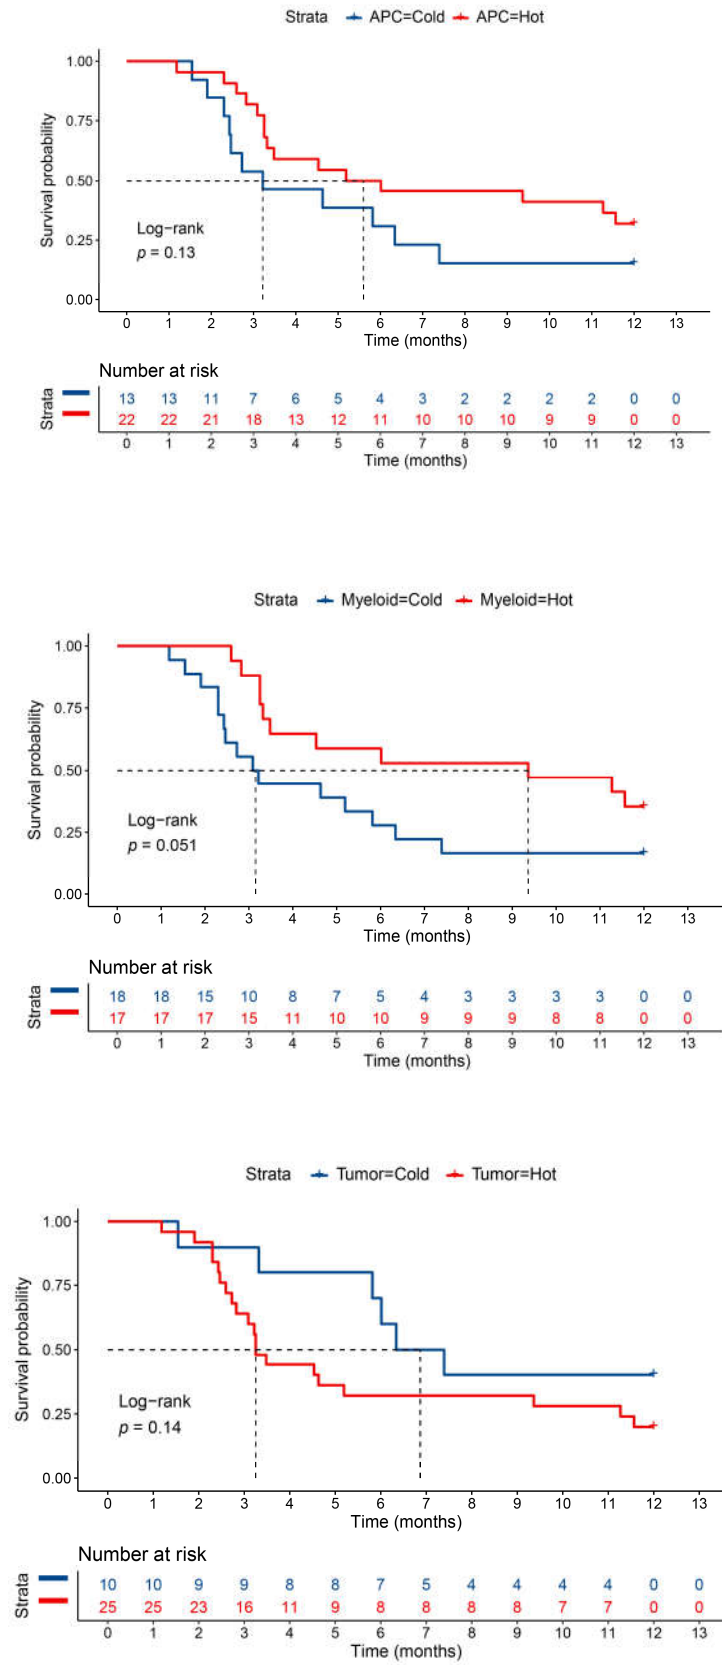

**Figure S3.** Progression-free survival (PFS) analysis of APC-related markers (9 proteins), myeloid/angiogenesis (25 proteins) and tumor-related markers (9 proteins) in the plasma signature (hot vs. cold). The log rank test was used to test for differences in survival.

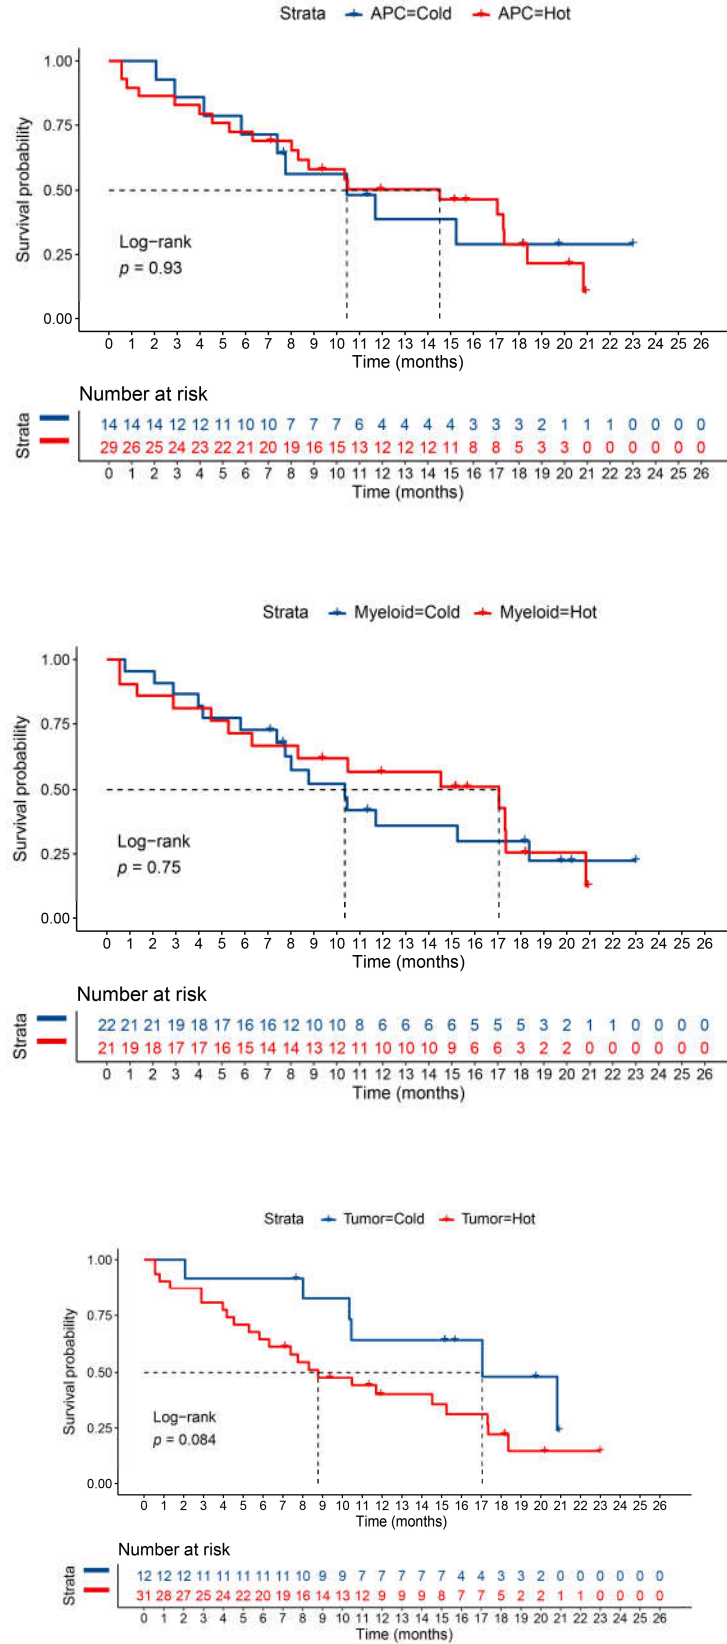

**Figure S4.** Overall survival (OS) analysis of APC-related markers (9 proteins), myeloid/angiogenesis (25 proteins) and tumor-related markers (9 proteins) in the plasma signature (hot vs. cold). The log rank test was used to test for differences in survival.

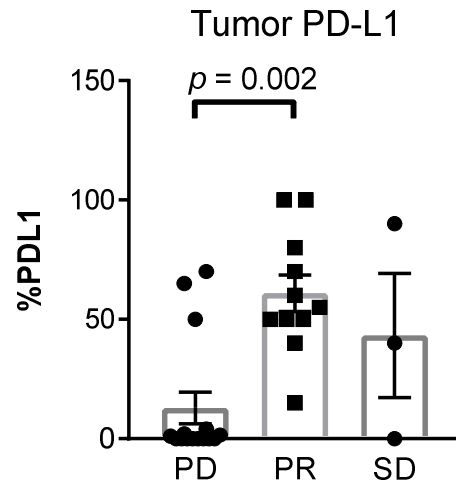

**Figure S5.** Comparison between patients with progressive disease (PD), spatial response (PD) and stable disease (SD) in terms of tumor expression of PD-L1, assessed by immunohistochemistry, before the initiation of anti-PD(L)1 therapy.

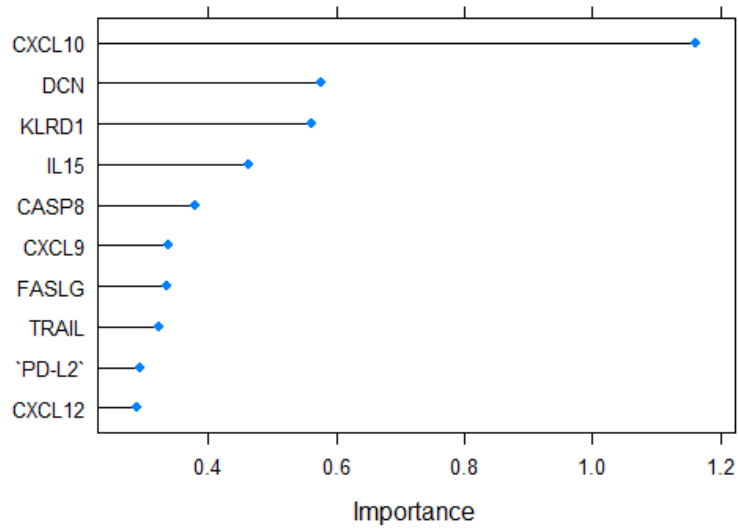

**Figure S6.** The top 10 proteins with the highest discrimination power in the random forest model.

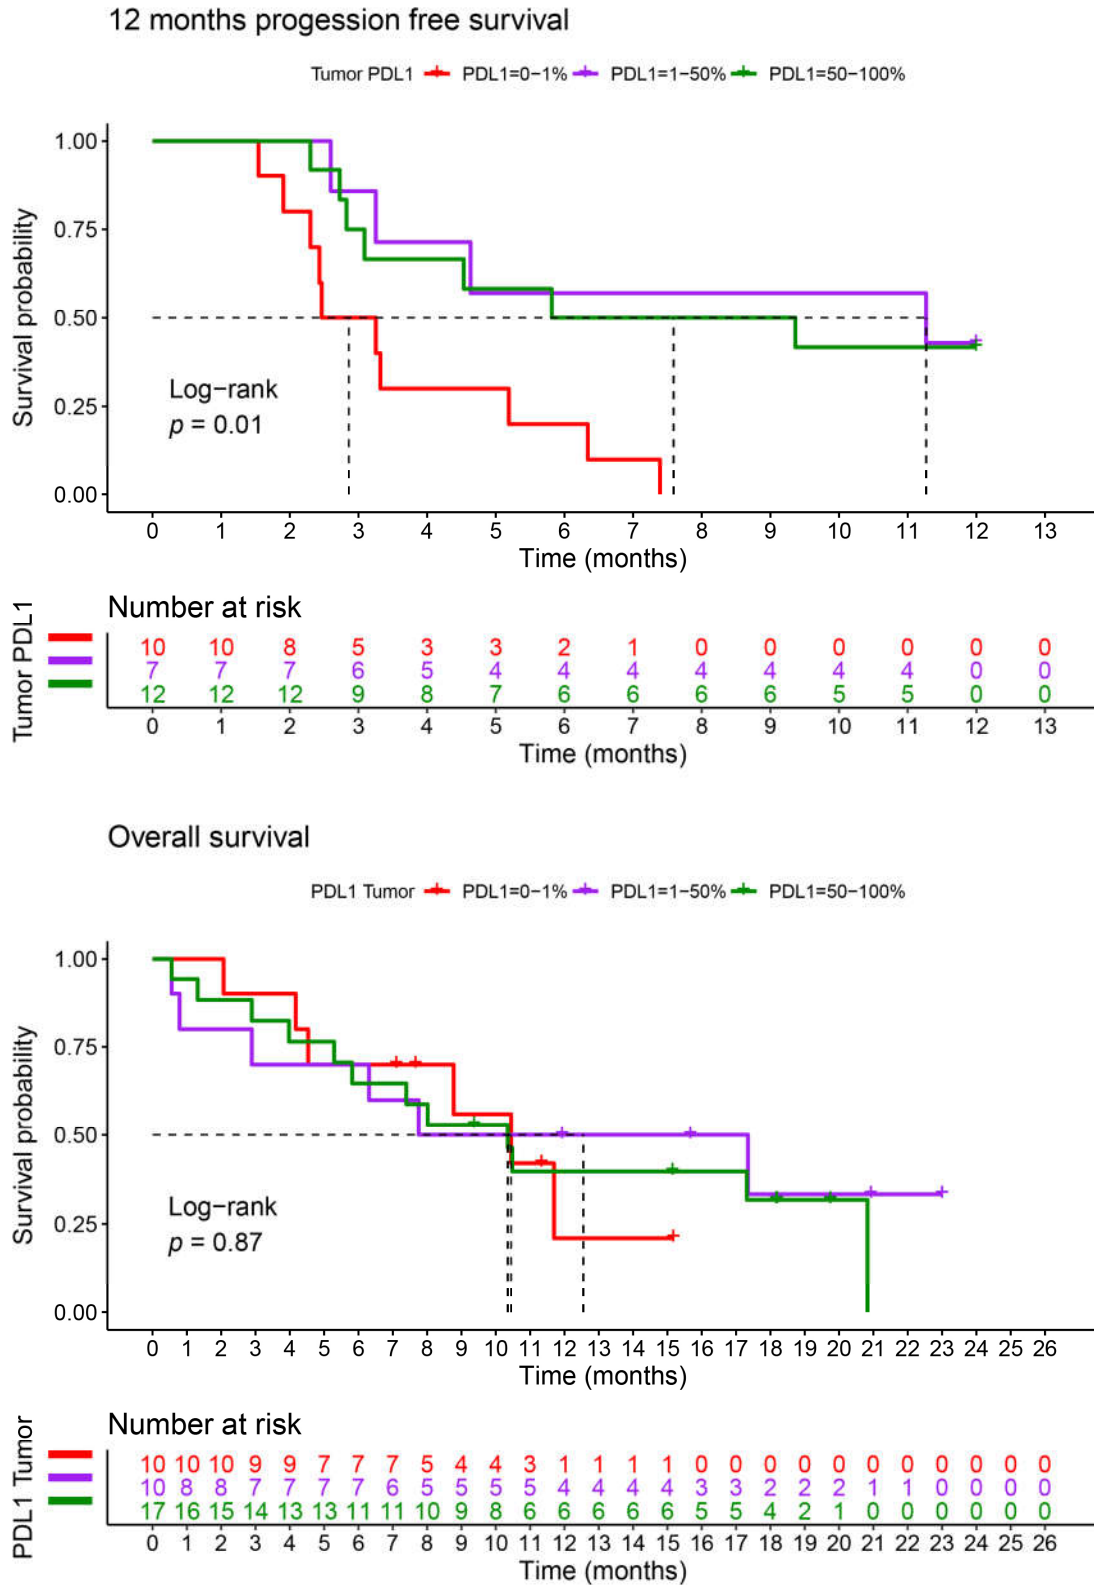

**Figure S7.** The association between progression-free survival (PFS) and overall survival (OS) and with the tumor PD-L1 expression. Kaplan-Meier curves of PFS and OS according to tumor PD-L1 expression groups (0-1%, 150% and 50-100%) are presented. Differences in survival between the groups were calculated by log rank test.

**Table S1.** Plasma proteins assessed with the multiplex proteomic analysis. The mean, median and standard deviation of the NPX value for each protein are displayed.

| #  | Biomarker | Mean   | Median | Standard deviation |
|----|-----------|--------|--------|--------------------|
| 1  | ADA       | 5.207  | 5.106  | 0.4876             |
| 2  | ADGRG1    | 2.623  | 2.317  | 1.224              |
| 3  | ANGPT1    | 9.029  | 9.198  | 1.003              |
| 4  | ANGPT2    | 5.788  | 5.881  | 0.4291             |
| 5  | CAIX      | 5.005  | 5.081  | 0.7626             |
| 6  | CASP-8    | 5.168  | 5.059  | 0.7809             |
| 7  | CCL17     | 9.834  | 9.803  | 1.067              |
| 8  | CCL19     | 9.164  | 9.208  | 1.049              |
| 9  | CCL20     | 7.606  | 7.498  | 1.018              |
| 10 | CCL23     | 10.23  | 10.32  | 0.6841             |
| 11 | CCL3      | 5.933  | 5.982  | 0.5311             |
| 12 | CCL4      | 6.531  | 6.665  | 0.4534             |
| 13 | CD244     | 6.28   | 6.203  | 0.3903             |
| 14 | CD27      | 7.935  | 7.908  | 0.5552             |
| 15 | CD4       | 3.509  | 3.482  | 0.3435             |
| 16 | CD40      | 10.16  | 10.15  | 0.4434             |
| 17 | CD40-L    | 7.08   | 7.281  | 1.463              |
| 18 | CD5       | 5.016  | 5.027  | 0.4071             |
| 19 | CD70      | 3.753  | 3.827  | 0.7026             |
| 20 | CD83      | 2.738  | 2.774  | 0.469              |
| 21 | CD8A      | 9.224  | 9.245  | 0.6812             |
| 22 | CRTAM     | 5.611  | 5.432  | 0.7388             |
| 23 | CSF-1     | 9.605  | 9.646  | 0.226              |
| 24 | CX3CL1    | 6.118  | 6.059  | 0.4415             |
| 25 | CXCL1     | 8.924  | 9.07   | 0.9046             |
| 26 | CXCL10    | 10.31  | 10.24  | 0.9831             |
| 27 | CXCL11    | 9.258  | 9.154  | 1.337              |
| 28 | CXCL12    | 0.7573 | 0.7392 | 0.2913             |
| 29 | CXCL13    | 9.058  | 8.972  | 0.8978             |
| 30 | CXCL5     | 11.11  | 11.23  | 1.11               |
| 31 | CXCL9     | 8.443  | 8.416  | 0.9723             |
| 32 | DCN       | 3.953  | 3.959  | 0.3928             |
| 33 | EGF       | 9.385  | 9.537  | 1.284              |
| 34 | FASLG     | 5.278  | 5.425  | 0.668              |
| 35 | FGF2      | 1.515  | 1.506  | 0.8661             |
| 36 | Gal-1     | 6.717  | 6.735  | 0.2355             |
| 37 | Gal-9     | 7.509  | 7.475  | 0.3624             |
| 38 | GZMA      | 6.959  | 6.935  | 0.6409             |
| 39 | GZMB      | 5.324  | 5.346  | 0.8977             |
| 40 | GZMH      | 5.07   | 5      | 0.9599             |
| 41 | HGF       | 9.177  | 8.951  | 0.8073             |
| 42 | HO-1      | 11.19  | 11.24  | 0.4382             |
| 43 | ICOSLG    | 4.788  | 4.794  | 0.2633             |
| 44 | IFN-gamma | 5.668  | 5.453  | 1.26               |
| 45 | IL10      | 3.779  | 3.389  | 1.297              |
| 46 | IL12      | 6.755  | 6.983  | 1.096              |
| 47 | IL12RB1   | 1.483  | 1.426  | 0.4478             |
| 48 | IL15      | 4.161  | 4.102  | 0.348              |
| 49 | IL18      | 8.945  | 8.891  | 0.7163             |
| 50 | IL6       | 4.437  | 4.64   | 1.452              |
| 51 | IL7       | 4.557  | 4.632  | 0.9291             |
| 52 | IL8       | 6.457  | 6.198  | 0.8853             |
| 53 | KIR3DL1   | 1.218  | 1.214  | 1.316              |
| 54 | KLRD1     | 6.566  | 6.559  | 0.7708             |
| 55 | LAG3      | 2.213  | 2.007  | 0.6784             |

|    |                |       |       |        |
|----|----------------|-------|-------|--------|
| 56 | LAMP3          | 4.842 | 4.976 | 0.7136 |
| 57 | LAP TGF-beta-1 | 9.114 | 9.113 | 0.702  |
| 58 | MCP-1          | 10.7  | 10.76 | 0.4852 |
| 59 | MCP-2          | 7.673 | 7.637 | 0.6686 |
| 60 | MCP-3          | 2.341 | 2.298 | 0.7292 |
| 61 | MCP-4          | 9.362 | 9.38  | 0.765  |
| 62 | MIC-A/B        | 4.013 | 4.594 | 1.759  |
| 63 | MMP12          | 8.066 | 7.982 | 1.391  |
| 64 | MMP7           | 9.503 | 9.532 | 0.3827 |
| 65 | MUC-16         | 5.045 | 4.672 | 1.77   |
| 66 | NCR1           | 3.507 | 3.503 | 0.473  |
| 67 | NOS3           | 1.647 | 1.582 | 0.6614 |
| 68 | PDCD1          | 4.12  | 4.09  | 0.5776 |
| 69 | PDGF subunit B | 9.753 | 9.954 | 0.4797 |
| 70 | PD-L1          | 5.633 | 5.669 | 0.5513 |
| 71 | PD-L2          | 1.99  | 1.957 | 0.3543 |
| 72 | PGF            | 8.266 | 8.202 | 0.4961 |
| 73 | PTN            | 4.295 | 4.115 | 1.282  |
| 74 | TIE2           | 7.042 | 7.099 | 0.289  |
| 75 | TNF            | 2.995 | 2.902 | 0.9964 |
| 76 | TNFRSF12A      | 4.942 | 4.808 | 0.5389 |
| 77 | TNFRSF21       | 7.269 | 7.218 | 0.264  |
| 78 | TNFRSF4        | 5.68  | 5.636 | 0.5821 |
| 79 | TNFRSF9        | 6.122 | 6.138 | 0.8479 |
| 80 | TNFSF14        | 4.79  | 4.587 | 0.883  |
| 81 | TRAIL          | 8.254 | 8.241 | 0.3355 |
| 82 | TWEAK          | 8.616 | 8.492 | 0.5121 |
| 83 | VEGFA          | 8.248 | 8.344 | 0.677  |
| 84 | VEGFR-2        | 8.016 | 8.027 | 0.2548 |

NPX= Normalized protein expression.

**Table S2.** Functional subgroups of the OLINK immuno-oncology proteins to T cell activation-, APC-, myeloid/angiogenesis- and tumor-related protein markers.

| <b>T cell activation</b> | <b>APC</b> | <b>Myeloid/angiogenesis</b> | <b>Tumor-related</b> |
|--------------------------|------------|-----------------------------|----------------------|
| TNFRSF9                  | CD40       | IL8                         | EGF                  |
| CD27                     | CD70       | ADA                         | ADGRG1               |
| CD4                      | CD83       | ANGPT1                      | ANGPT2               |
| CD40-L                   | ICOSLG     | ARG1                        | DCN                  |
| CD8A                     | IL12       | CCL17                       | FGF2                 |
| CX3CL1                   | IL12RB1    | CCL3                        | HGF                  |
| CXCL10                   | LAMP3      | CCL4                        | MUC-16               |
| CXCL11                   | PD-L1      | CSF-1                       | PDGF subunit B       |
| CXCL9                    | PD-L2      | CXCL1                       | PTN                  |
| FASLG                    |            | CXCL12                      |                      |
| GZMA                     |            | CXCL5                       |                      |
| GZMB                     |            | Gal-1                       |                      |
| GZMH                     |            | Gal-9                       |                      |
| IFN-gamma                |            | LAP TGF-beta-1              |                      |
| IL15                     |            | MCP-1                       |                      |
| IL7                      |            | MCP-2                       |                      |
| KLRD1                    |            | MCP-3                       |                      |
| TNF                      |            | MCP-4                       |                      |
| TNFRSF21                 |            | MMP12                       |                      |
| TNFRSF4                  |            | MMP7                        |                      |
| TNFSF14                  |            | NOS3                        |                      |
| TRAIL                    |            | PGF                         |                      |
|                          |            | TIE2                        |                      |



TNFRSF12A

VEGFA

VEGFR-2

---

APC=antigen-presenting cell.

**Table S3.** Plasma proteins assessed with the multiplex proteomic analysis. The median NPX values for each protein in the immune "hot" and immune "cold" clusters based on T cell activation-related markers are displayed. p-value determined by t-test with correction for multiple testing (FDR).

| Rank | Protein  | Hot signature median | Cold signature median | p value               | q value               |
|------|----------|----------------------|-----------------------|-----------------------|-----------------------|
| 1    | CD4      | 3.716                | 3.247                 | $3.87 \times 10^{-7}$ | $1.83 \times 10^{-6}$ |
| 2    | CXCL10   | 10.9                 | 9.548                 | $2.62 \times 10^{-7}$ | $1.83 \times 10^{-6}$ |
| 3    | CXCL9    | 8.997                | 7.744                 | $2.71 \times 10^{-6}$ | $8.53 \times 10^{-6}$ |
| 4    | TNFRSF4  | 6.006                | 5.268                 | $4.32 \times 10^{-6}$ | $1.02 \times 10^{-5}$ |
| 5    | CD27     | 8.239                | 7.552                 | $8.62 \times 10^{-6}$ | $1.63 \times 10^{-5}$ |
| 6    | GZMA     | 7.271                | 6.542                 | $6.66 \times 10^{-5}$ | 0.000105              |
| 7    | CD8A     | 9.532                | 8.835                 | 0.000415              | 0.00049               |
| 8    | GZMH     | 5.505                | 4.521                 | 0.000404              | 0.00049               |
| 9    | TNFRSF9  | 6.481                | 5.667                 | 0.001049              | 0.001078              |
| 10   | GZMB     | 5.703                | 4.846                 | 0.001141              | 0.001078              |
| 11   | KLRD1    | 6.884                | 6.164                 | 0.001508              | 0.001295              |
| 12   | TNF      | 3.396                | 2.488                 | 0.002008              | 0.001581              |
| 13   | IFNg     | 6.154                | 5.053                 | 0.003255              | 0.002366              |
| 14   | CD40-L   | 6.68                 | 7.585                 | 0.042516              | 0.028698              |
| 15   | TNFRSF21 | 7.342                | 7.178                 | 0.041493              | 0.028698              |
| 16   | CX3CL1   | 6.216                | 5.993                 | 0.100784              | 0.063494              |
| 17   | FASLG    | 5.409                | 5.112                 | 0.150109              | 0.088658              |
| 18   | TRAIL    | 8.31                 | 8.184                 | 0.229153              | 0.127382              |
| 19   | IL7      | 4.437                | 4.71                  | 0.343917              | 0.180556              |
| 20   | TNFSF14  | 4.707                | 4.895                 | 0.49519               | 0.246292              |
| 21   | CXCL11   | 9.3                  | 9.205                 | 0.819258              | 0.387099              |
| 22   | IL15     | 4.159                | 4.164                 | 0.962634              | 0.433185              |

Note that NPS is a Log2 value.

**Table S4.** Plasma proteins assessed with the multiplex proteomic analysis. The mean and NPX values for each protein in the clinical benefit (partial response and stable disease) and progressive disease patients are displayed. p-value determined by t-test with correction for multiple testing (FDR). Note that NPS is a Log2 value.

| Rank | Protein    | Mean "clinical benefit" | Mean "progressive disease" | p value         | q value         |
|------|------------|-------------------------|----------------------------|-----------------|-----------------|
| 1    | PDL1 Tumor | 57.73                   | 13.17                      | <b>0.000262</b> | <b>0.023022</b> |
| 2    | IL15       | 4.309                   | 3.999                      | <b>0.006163</b> | 0.182929        |
| 3    | CXCL10     | 10.84                   | 9.873                      | <b>0.006236</b> | 0.182929        |
| 4    | CASP-8     | 4.758                   | 5.4                        | <b>0.016016</b> | 0.303636        |
| 5    | ADA        | 4.958                   | 5.365                      | <b>0.018657</b> | 0.303636        |
| 6    | CXCL9      | 8.828                   | 8.127                      | <b>0.049878</b> | 0.521184        |
| 7    | PGF        | 8.431                   | 8.095                      | 0.051795        | 0.521184        |
| 8    | MCP-3      | 2.493                   | 2.044                      | 0.058539        | 0.521184        |
| 9    | Gal-9      | 7.617                   | 7.391                      | 0.065608        | 0.521184        |
| 10   | IFN-gamma  | 6.166                   | 5.469                      | 0.068418        | 0.521184        |
| 11   | DCN        | 4.149                   | 3.845                      | 0.06970         | 0.303636        |
| 12   | TNFRSF4    | 5.87                    | 5.503                      | 0.07107         | 0.521184        |
| 13   | MUC-16     | 4.308                   | 5.356                      | 0.087766        | 0.541064        |
| 14   | TNFRSF12A  | 5.099                   | 4.77                       | 0.091075        | 0.541064        |
| 15   | CD70       | 3.984                   | 3.573                      | 0.105971        | 0.541064        |
| 16   | HO-1       | 11.11                   | 11.35                      | 0.10808         | 0.541064        |
| 17   | HGF        | 9.371                   | 8.941                      | 0.11093         | 0.541064        |
| 18   | CXCL12     | 0.6879                  | 0.8437                     | 0.116672        | 0.541064        |
| 19   | CX3CL1     | 6.278                   | 6.033                      | 0.116821        | 0.541064        |
| 20   | PTN        | 4.761                   | 4.037                      | 0.123117        | 0.541715        |
| 21   | PD-L2      | 2.098                   | 1.913                      | 0.150863        | 0.573343        |
| 22   | ADGRG1     | 2.887                   | 2.276                      | 0.15439         | 0.573343        |
| 23   | TNF        | 3.25                    | 2.711                      | 0.155873        | 0.573343        |

|    |                |       |       |          |          |
|----|----------------|-------|-------|----------|----------|
| 24 | TNFRSF21       | 7.307 | 7.189 | 0.166476 | 0.573343 |
| 25 | MCP-1          | 10.86 | 10.62 | 0.170468 | 0.573343 |
| 26 | CXCL13         | 9.291 | 8.838 | 0.172898 | 0.573343 |
| 27 | CD4            | 3.581 | 3.433 | 0.176223 | 0.573343 |
| 28 | CCL3           | 6.032 | 5.78  | 0.182427 | 0.573343 |
| 29 | CD244          | 6.144 | 6.311 | 0.20072  | 0.602436 |
| 30 | VEGFR-2        | 7.967 | 8.088 | 0.205376 | 0.602436 |
| 31 | IL12RB1        | 1.515 | 1.348 | 0.239934 | 0.665457 |
| 32 | LAG3           | 2.326 | 2.038 | 0.241984 | 0.665457 |
| 33 | ANGPT2         | 5.868 | 5.714 | 0.271646 | 0.689068 |
| 34 | CD27           | 8.005 | 7.79  | 0.278714 | 0.689068 |
| 35 | TRAIL          | 8.356 | 8.241 | 0.279761 | 0.689068 |
| 36 | CD40-L         | 6.74  | 7.3   | 0.281891 | 0.689068 |
| 37 | NCR1           | 3.591 | 3.424 | 0.310299 | 0.719422 |
| 38 | NOS3           | 1.654 | 1.439 | 0.318955 | 0.719422 |
| 39 | LAMP3          | 4.963 | 4.71  | 0.324723 | 0.719422 |
| 40 | MCP-2          | 7.513 | 7.736 | 0.32701  | 0.719422 |
| 41 | IL18           | 8.726 | 8.956 | 0.344386 | 0.724964 |
| 42 | TNFSF14        | 4.589 | 4.865 | 0.346006 | 0.724964 |
| 43 | CD8A           | 9.294 | 9.076 | 0.367658 | 0.737002 |
| 44 | IL10           | 3.853 | 3.475 | 0.368501 | 0.737002 |
| 45 | MMP7           | 9.61  | 9.496 | 0.393688 | 0.76988  |
| 46 | CSF-1          | 9.644 | 9.583 | 0.408107 | 0.780727 |
| 47 | IL12           | 6.817 | 6.547 | 0.437593 | 0.819323 |
| 48 | CCL20          | 7.691 | 7.42  | 0.471473 | 0.839447 |
| 49 | LAP TGF-beta-1 | 9.013 | 9.184 | 0.473007 | 0.839447 |
| 50 | CD83           | 2.751 | 2.649 | 0.483856 | 0.839447 |
| 51 | TNFRSF9        | 6.242 | 6.027 | 0.494951 | 0.839447 |
| 52 | CD40           | 10.08 | 10.19 | 0.502586 | 0.839447 |
| 53 | ICOSLG         | 4.839 | 4.775 | 0.505576 | 0.839447 |
| 54 | GZMB           | 5.475 | 5.301 | 0.559537 | 0.890777 |
| 55 | FGF2           | 1.364 | 1.521 | 0.607358 | 0.890777 |
| 56 | PD-L1          | 5.522 | 5.626 | 0.607603 | 0.890777 |
| 57 | CCL17          | 9.999 | 9.822 | 0.624336 | 0.890777 |
| 58 | CD5            | 4.962 | 5.031 | 0.62522  | 0.890777 |
| 59 | IL6            | 4.092 | 4.315 | 0.632362 | 0.890777 |
| 60 | GZMA           | 6.869 | 6.974 | 0.637715 | 0.890777 |
| 61 | MCP-4          | 9.481 | 9.362 | 0.655205 | 0.899878 |
| 62 | CAIX           | 5.062 | 4.951 | 0.664682 | 0.899878 |
| 63 | IL7            | 4.422 | 4.554 | 0.679067 | 0.905423 |
| 64 | MIC-A/B        | 3.912 | 3.657 | 0.702912 | 0.909989 |
| 65 | KIR3DL1        | 1.461 | 1.275 | 0.710565 | 0.909989 |
| 66 | FASLG          | 5.316 | 5.388 | 0.713514 | 0.909989 |
| 67 | PDGF subunit B | 9.733 | 9.781 | 0.775351 | 0.968643 |
| 68 | EGF            | 9.329 | 9.457 | 0.781519 | 0.968643 |
| 69 | CCL23          | 10.21 | 10.16 | 0.807238 | 0.97982  |
| 70 | IL8            | 6.432 | 6.356 | 0.812806 | 0.97982  |
| 71 | TIE2           | 7.018 | 7.039 | 0.839692 | 0.982517 |
| 72 | VEGFA          | 8.173 | 8.214 | 0.855355 | 0.982517 |
| 73 | CCL4           | 6.488 | 6.515 | 0.858651 | 0.982517 |
| 74 | MMP12          | 8.089 | 8.003 | 0.867502 | 0.982517 |
| 75 | CXCL11         | 9.279 | 9.204 | 0.879076 | 0.982517 |
| 76 | ANGPT1         | 9.042 | 9.086 | 0.89431  | 0.982517 |
| 77 | CXCL5          | 11.17 | 11.22 | 0.903486 | 0.982517 |
| 78 | CXCL1          | 8.936 | 8.899 | 0.907709 | 0.982517 |
| 79 | PDCD1          | 4.106 | 4.084 | 0.918678 | 0.982517 |
| 80 | CCL19          | 9.224 | 9.191 | 0.927029 | 0.982517 |
| 81 | Gal-1          | 6.741 | 6.735 | 0.94756  | 0.982517 |

|    |       |       |       |          |          |
|----|-------|-------|-------|----------|----------|
| 82 | KLRD1 | 6.493 | 6.476 | 0.952431 | 0.982517 |
| 83 | TWEAK | 8.678 | 8.684 | 0.969791 | 0.982517 |
| 84 | GZMH  | 5.003 | 4.991 | 0.971352 | 0.982517 |
| 85 | CRTAM | 5.54  | 5.545 | 0.987367 | 0.987367 |

---
